# Supplementary material
Source: PubMed Central journal article supplement (PMC1782377)

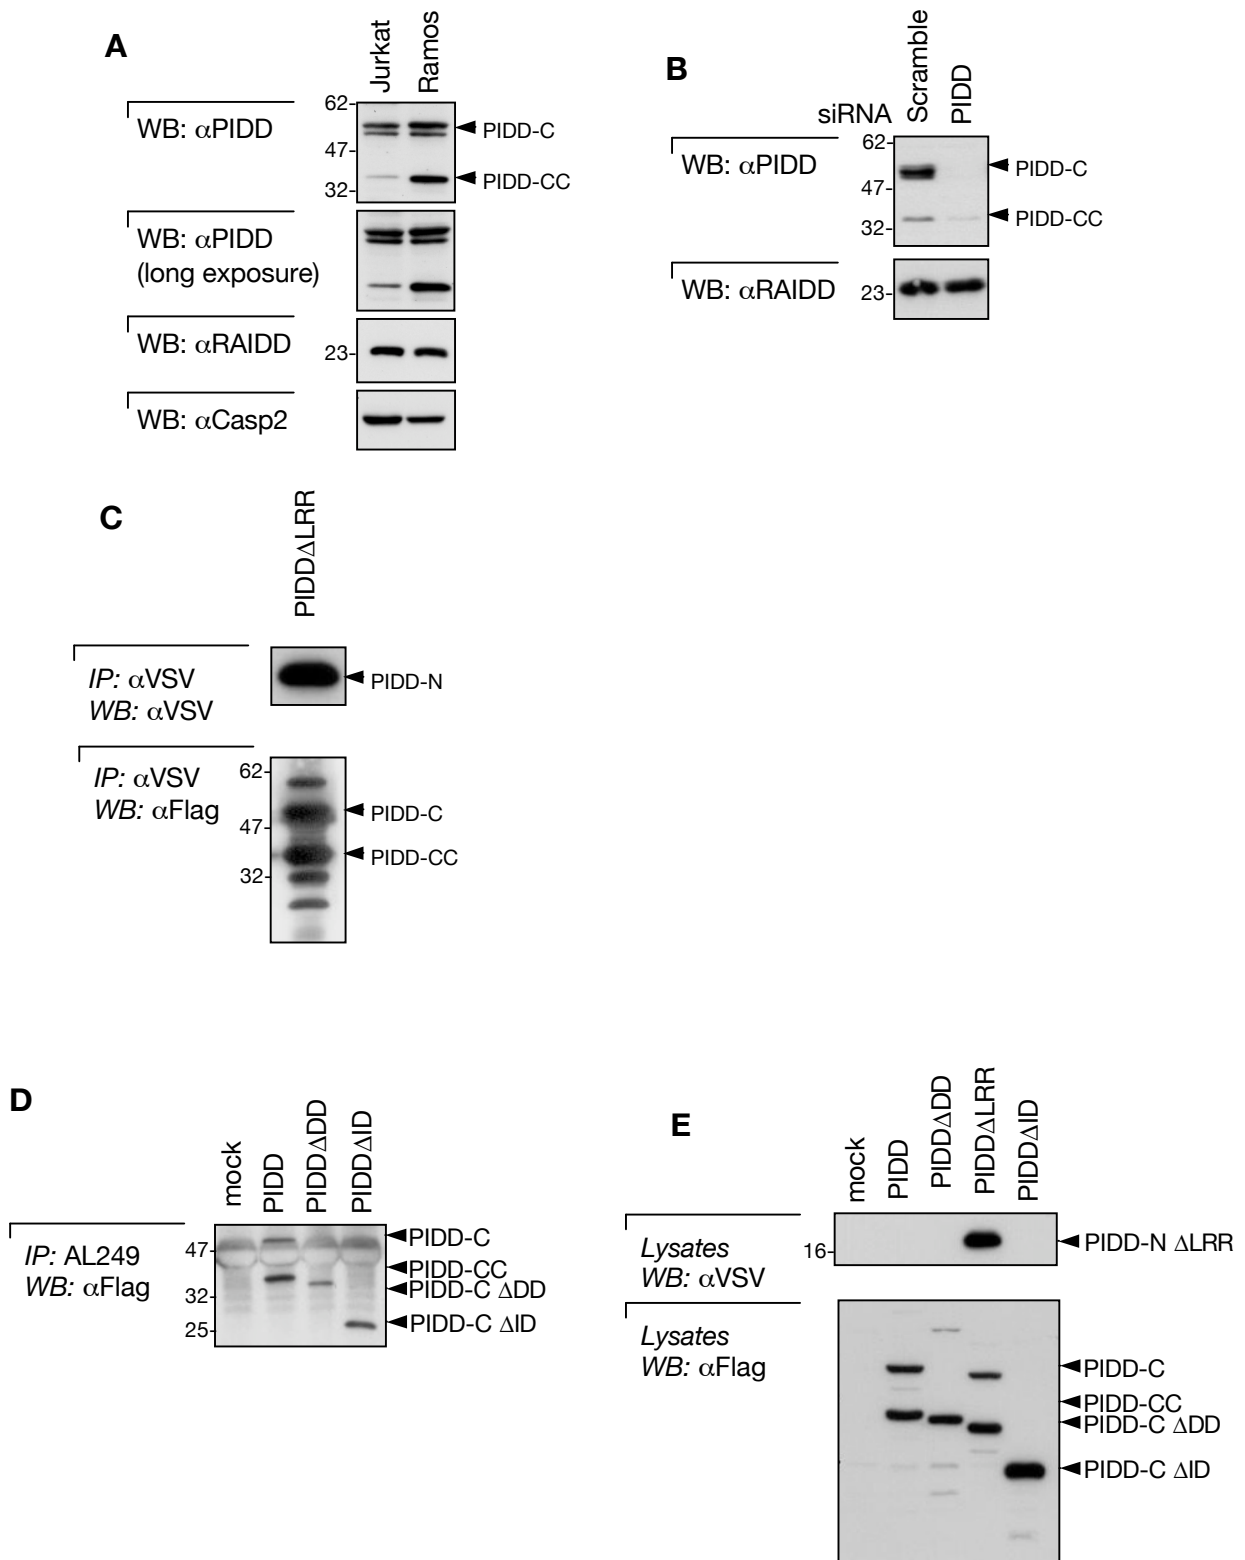

Suppl. Figure 1

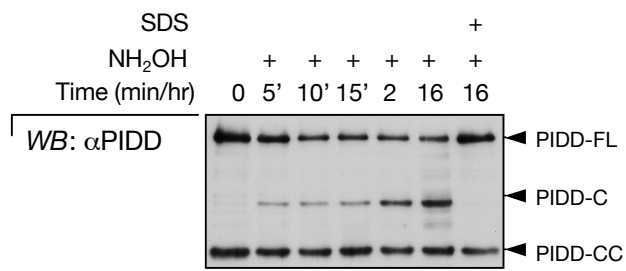

**Suppl. Figure 2**

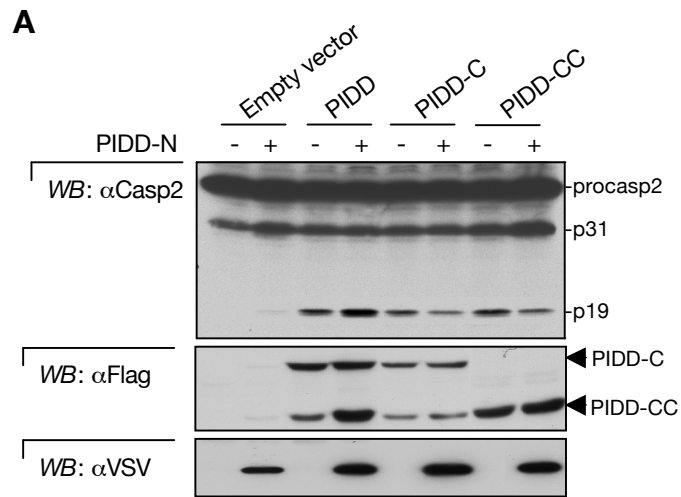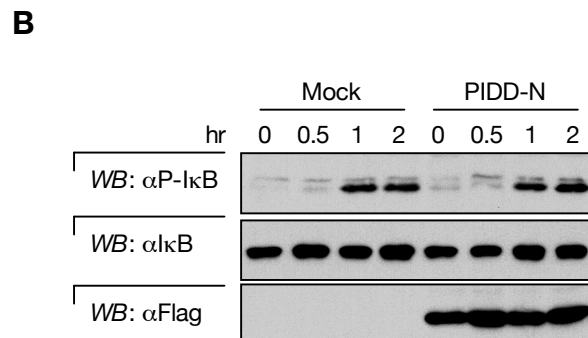

Suppl. Figure 3

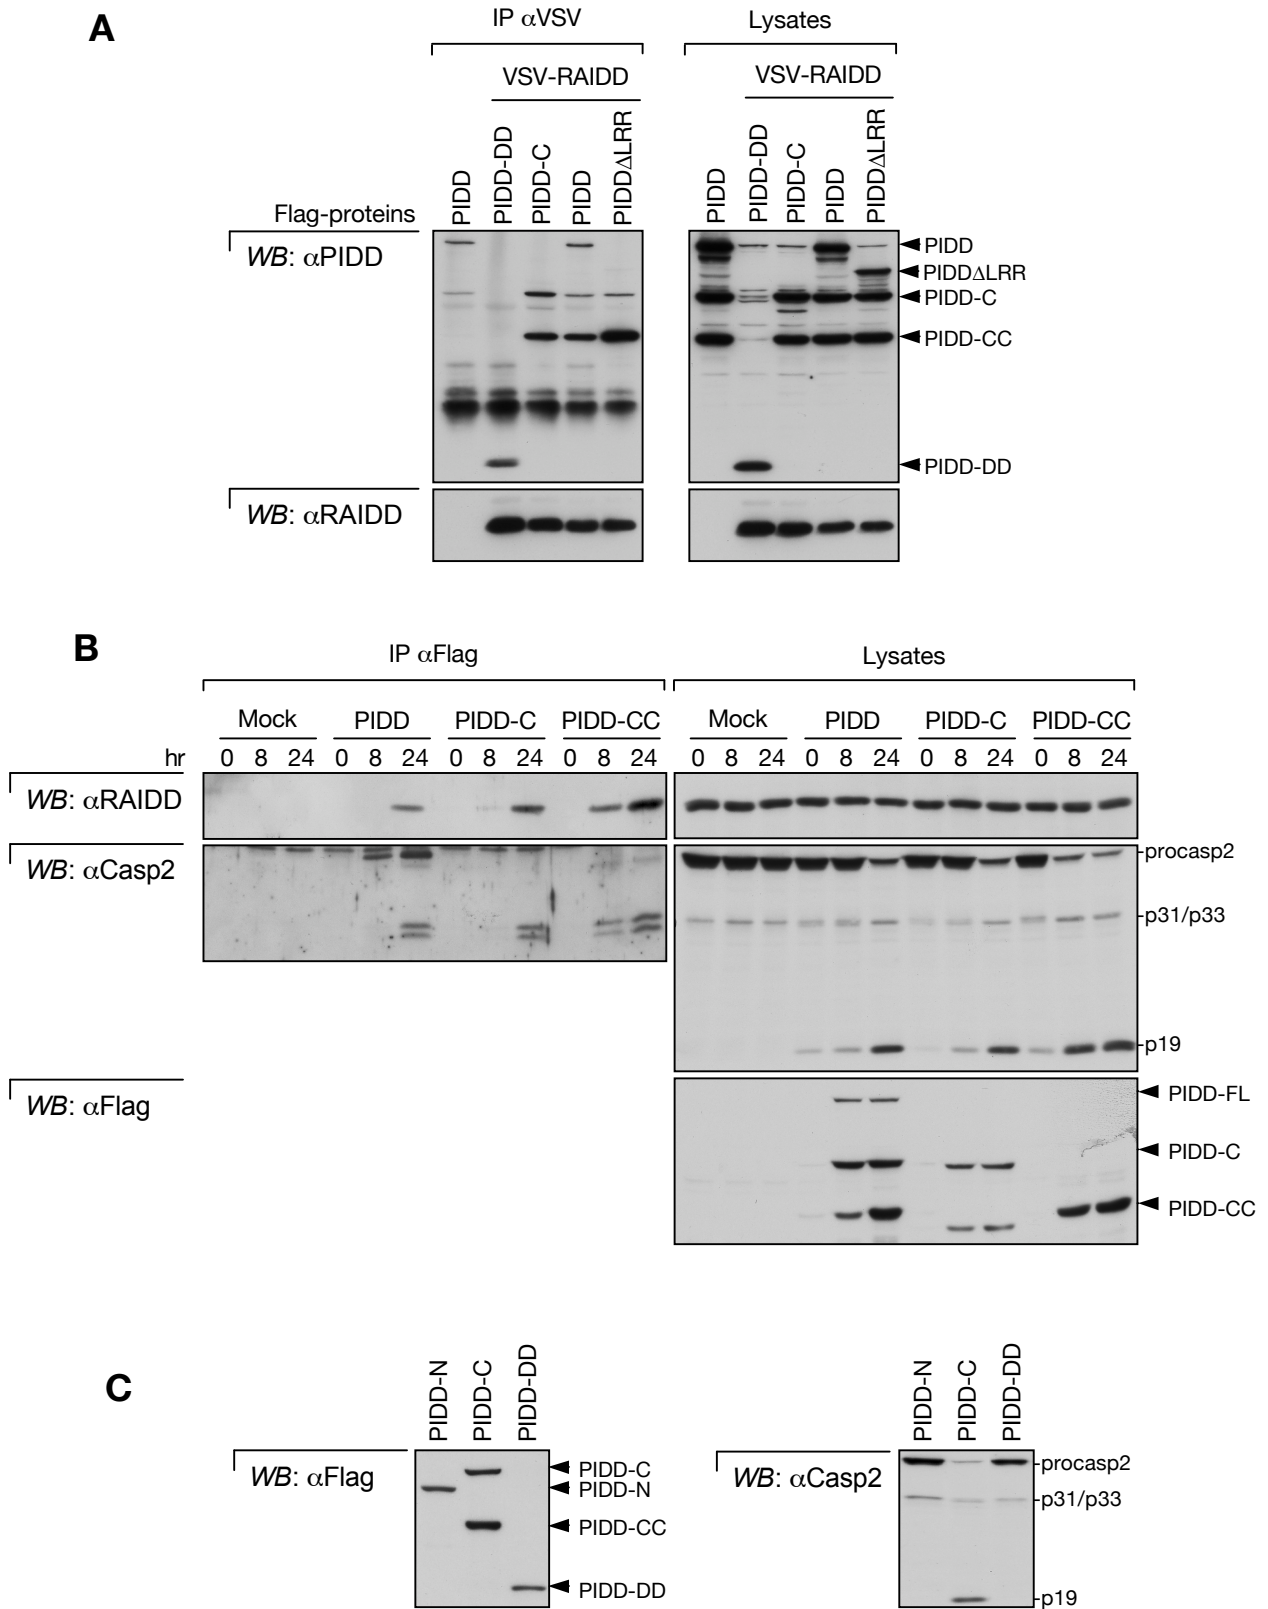

Suppl. Figure 4

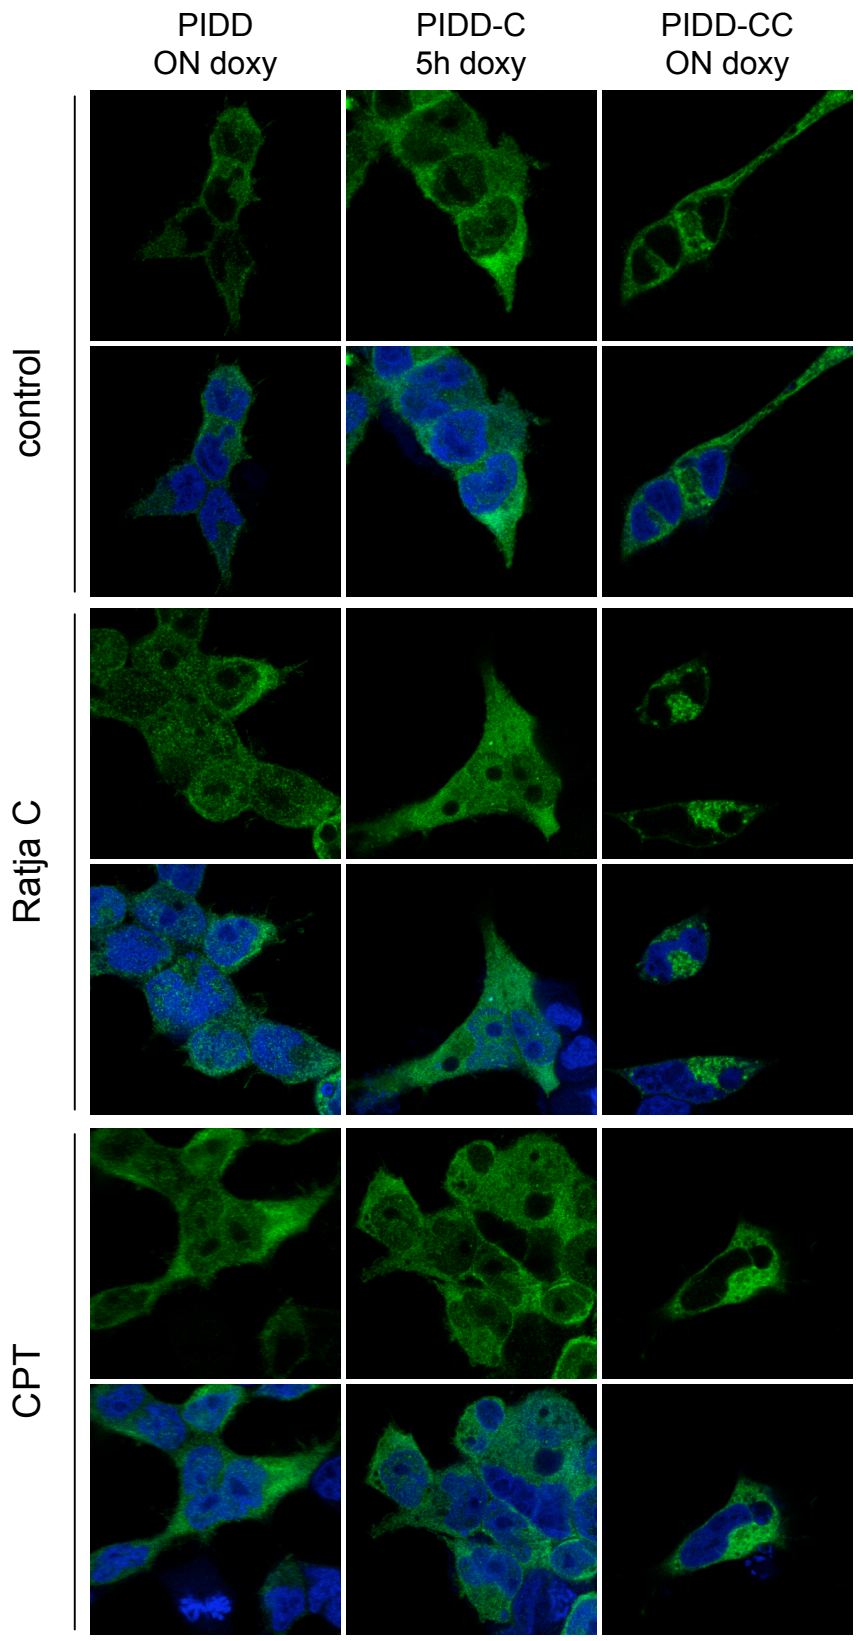

Suppl. Figure 5

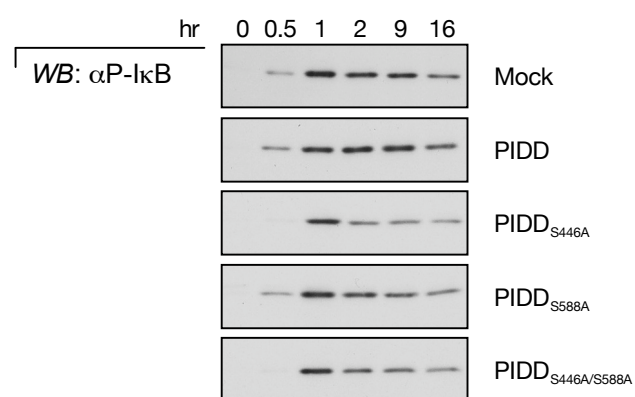

Suppl. Figure 6

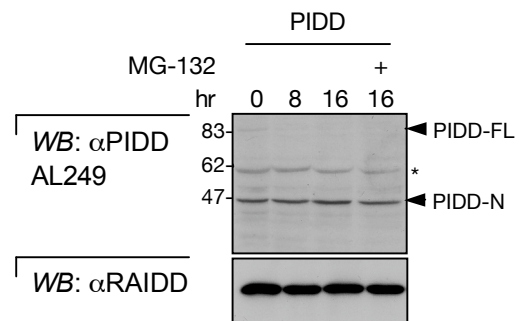

Suppl. Figure 7

Supplement: 7601473s1.pdf [file 7601473s1.pdf]
